# Supplementary material for: A Strategy to Elicit M2e-Specific Antibodies Using a Recombinant H7N9 Live Attenuated Influenza Vaccine Expressing Multiple M2e Tandem Repeats
Source: PubMed Central journal article supplement (PMC7912525; doi:10.3390/biomedicines9020133), 2021-02-01
Supplement: biomedicines-09-00133-s001.pdf [file biomedicines-09-00133-s001.pdf]

Supplement Materials for manuscript "A strategy to elicit M2e-specific antibodies using a recombinant H7N9 live attenuated influenza vaccine expressing multiple M2e tandem repeats"

### Gating Strategy of degranulated NK-cells

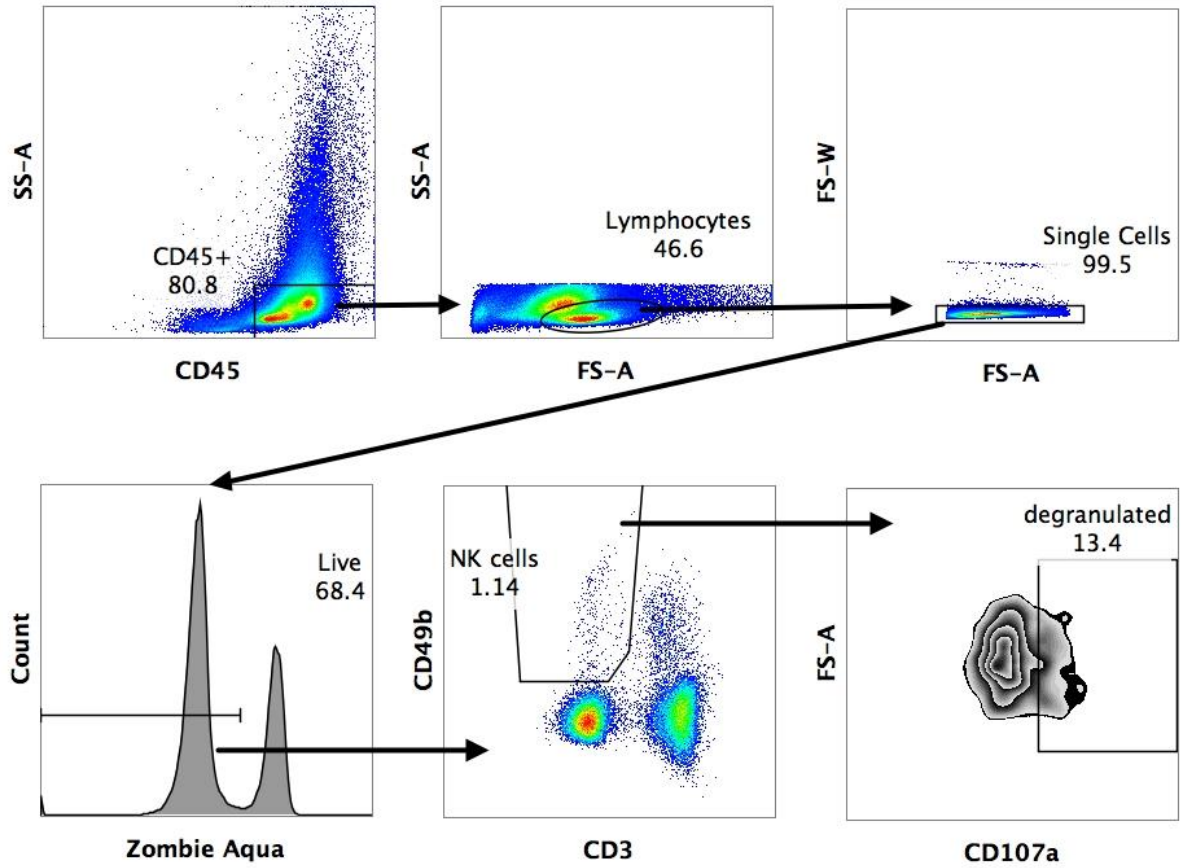

Figure S1. Gating strategy for NK cell degranulation assay.

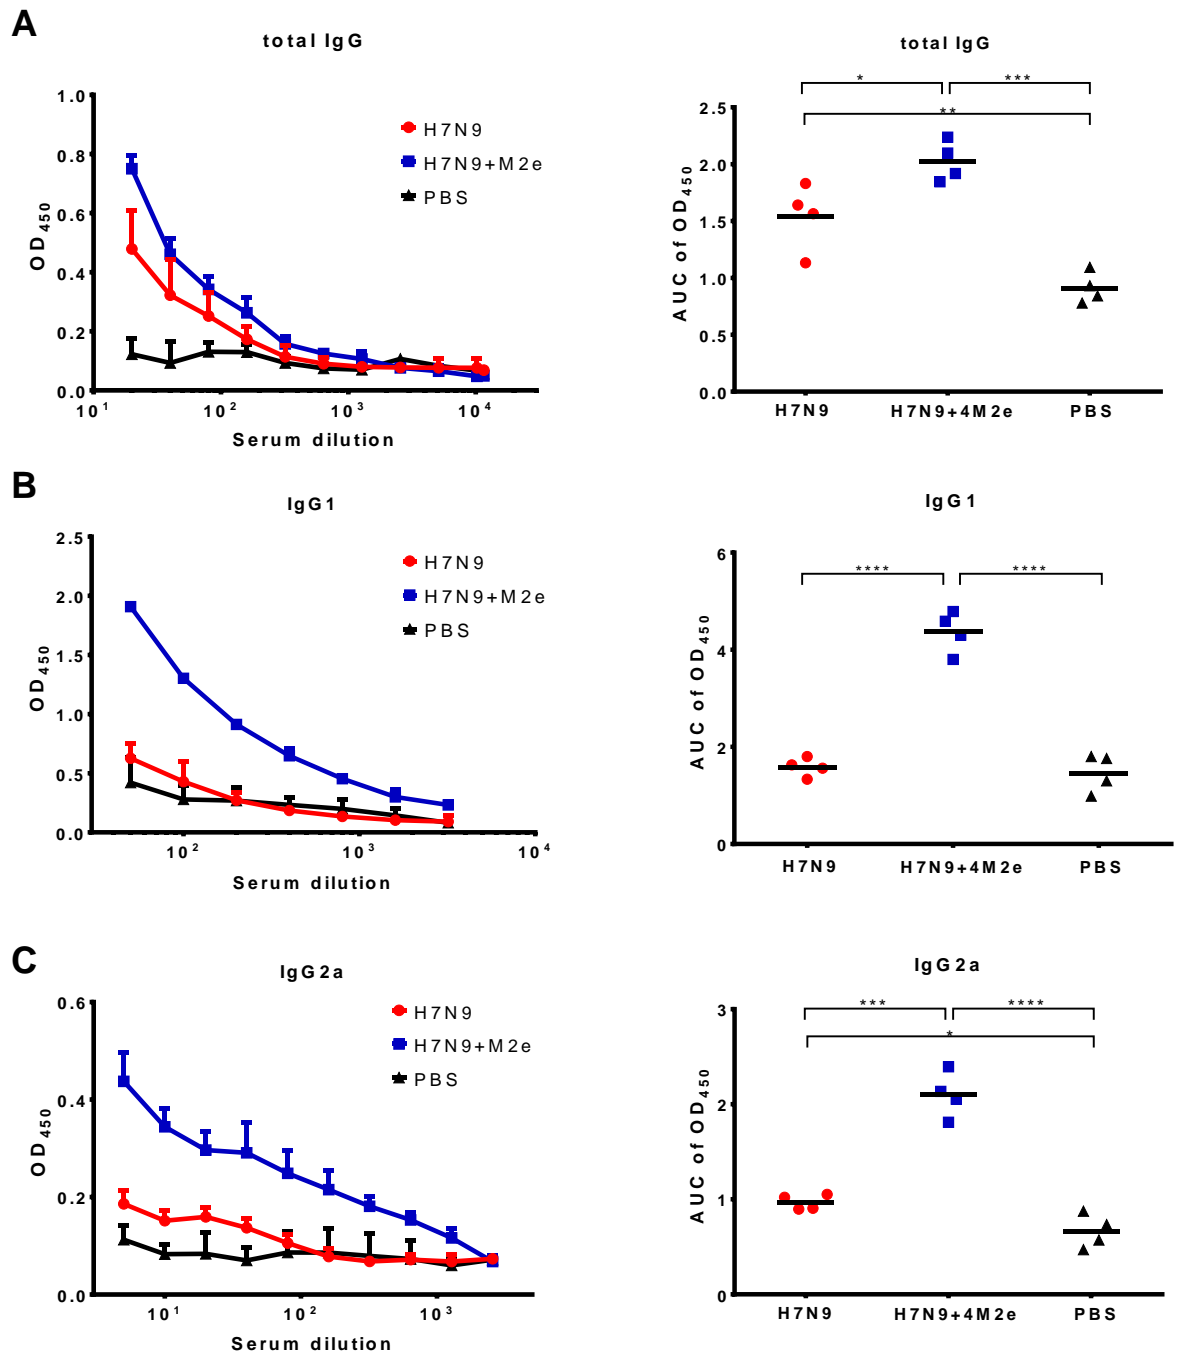

**Figure S2.** Serum IgG (A), IgG1 (B) and IgG2a (C) antibody responses in BALB/c mice immunized with H7N9+4M2e and H7N9 LAIVs six days after challenge with A/South Africa/3626/2013 (H1N1pdm09). Left panel shows the mean+SD of OD<sub>450</sub> values; right panel shows the area under the OD<sub>450</sub> curve (AUC) values for individual animal. The AUC data were analyzed with one-way ANOVA followed by a Tukey's multiple comparison test (\* -  $p < 0.05$ ; \*\* -  $p < 0.01$ ; \*\*\* -  $p < 0.001$ ; \*\*\*\* -  $p < 0.0001$ ).

**Table S1.** Sequences of M2e-epitopes of influenza A viruses used in this study.

|         | 1 | 2 | 3 | 4 | 5 | 6 | 7 | 8 | 9 | 10 | 11 | 12 | 13 | 14 | 15 | 16 | 17 | 18 | 19 | 20 | 21 | 22 | 23 | 24 |
|---------|---|---|---|---|---|---|---|---|---|----|----|----|----|----|----|----|----|----|----|----|----|----|----|----|
| human   | M | S | L | L | T | E | V | E | T | P  | I  | R  | N  | E  | W  | G  | S  | R  | S  | N  | D  | S  | S  | D  |
| avian   | M | S | L | L | T | E | V | E | T | P  | T  | R  | S  | E  | W  | G  | S  | R  | S  | S  | D  | S  | S  | D  |
| swine   | M | S | L | L | T | E | V | E | T | P  | T  | R  | N  | E  | W  | E  | S  | R  | S  | S  | D  | S  | S  | D  |
| H3N2    | M | S | L | L | T | E | V | E | T | P  | I  | R  | N  | E  | W  | G  | C  | R  | C  | N  | D  | S  | S  | D  |
| H9N2    | M | S | L | L | T | E | V | E | T | L  | T  | R  | N  | G  | W  | E  | C  | K  | C  | S  | D  | S  | S  | D  |
| PR8     | M | S | L | L | T | E | V | E | T | P  | I  | R  | N  | E  | W  | G  | C  | R  | C  | N  | G  | S  | S  | D  |
| H1N1 SA | M | S | L | L | T | E | V | E | T | P  | T  | R  | S  | E  | W  | E  | C  | R  | C  | S  | G  | S  | S  | D  |
